# Supplementary material for: In utero exposure to acetaminophen and ibuprofen leads to intergenerational accelerated reproductive aging in female mice
Source: PubMed Central journal article supplement (PMC6692356; doi:10.1038/s42003-019-0552-x), 2019-08-13
Supplement: 42003_2019_552_MOESM1_ESM.pdf [file 42003_2019_552_MOESM1_ESM.pdf]

**Supplementary Information**

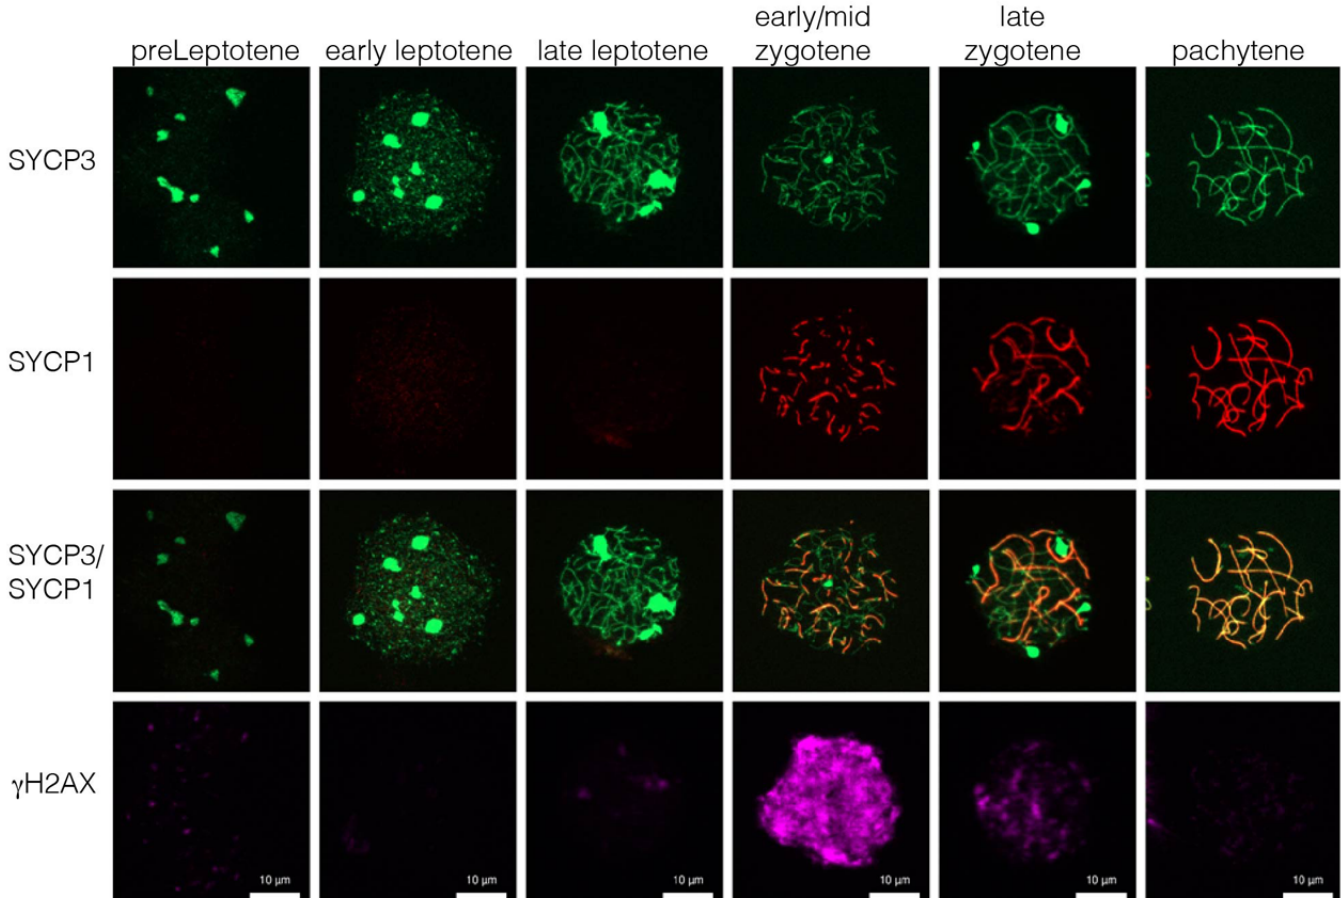

**Supplementary Fig. 1.** SYCP3, SYCP1 and  $\gamma$ H2AX staining changes during meiotic prophase I substages.

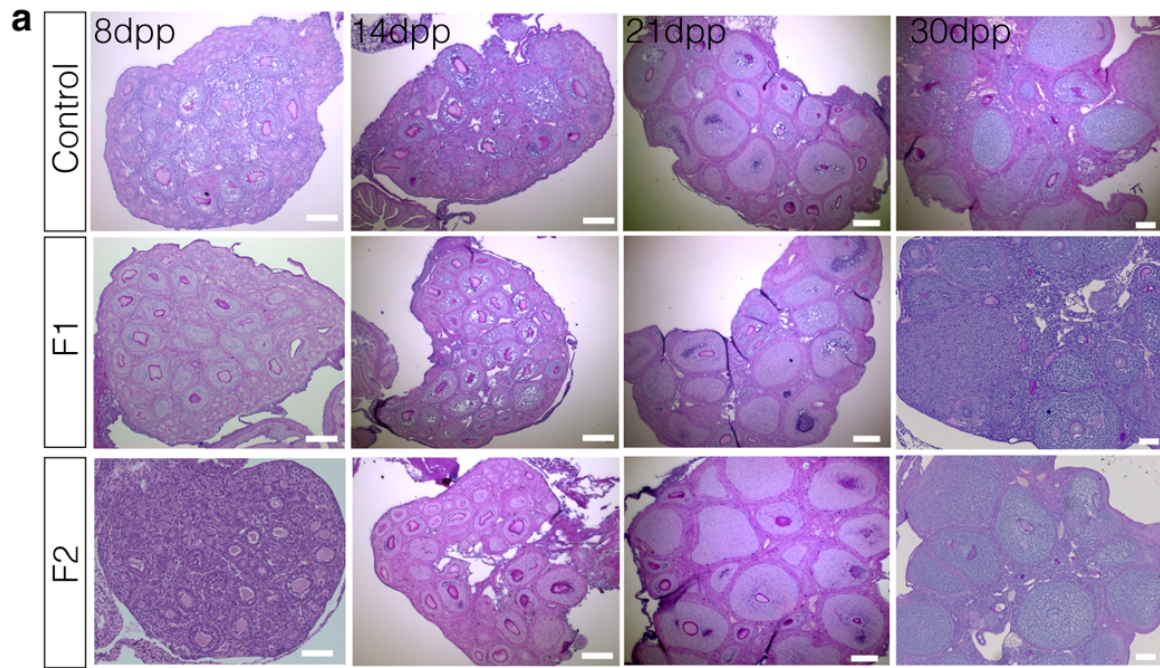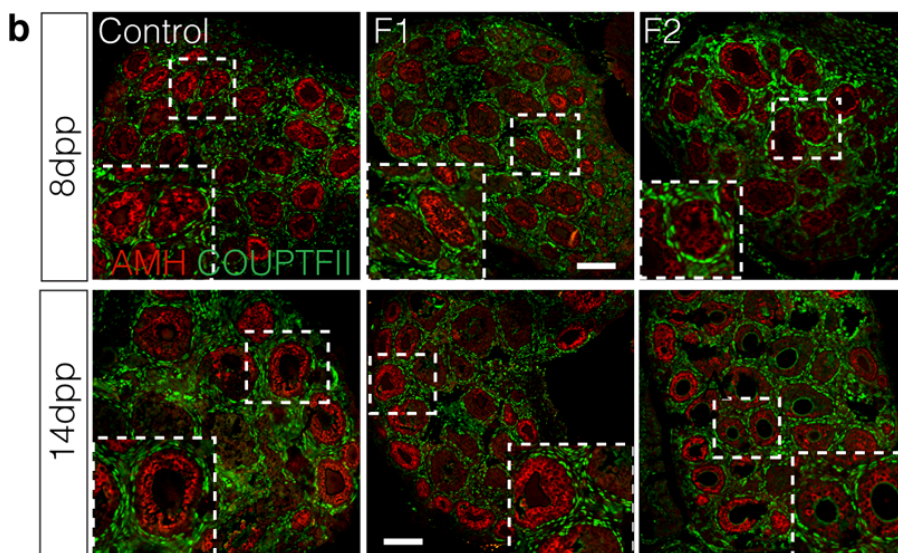

**Supplementary Fig. 2.** Follicular development in postnatal ovaries of *in utero* exposed animals and their offspring. **a** Representative images of paraffin-embedded tissue sections from 8, 14, 21 and 30dpp control, F1 and F2 ovaries, stained with the Periodic acid-Shiff dye. Scale bars= 80 $\mu$ m. **b** Representative immunofluorescence images for AMH (granulosa cell marker, red) and COUPTFII (interstitial cell marker, green) in tissue sections from 8 and 14dpp control, F1 and F2 ovaries. Enlarged panels show representative growing follicles. Scale bars=80 $\mu$ m.

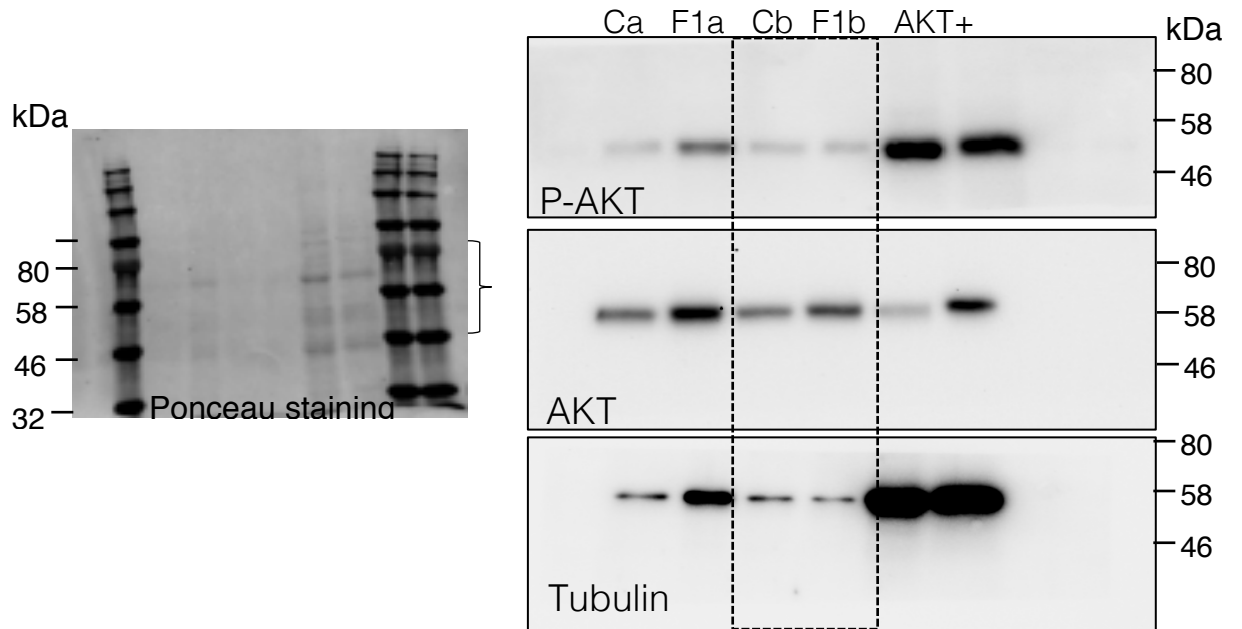

**Supplementary Fig. 3.** Full scans of images of Western blot data; C=8jpp control gonads, F1=8dpp F1 gonads; AKT+ is a positive AKT cell extract.

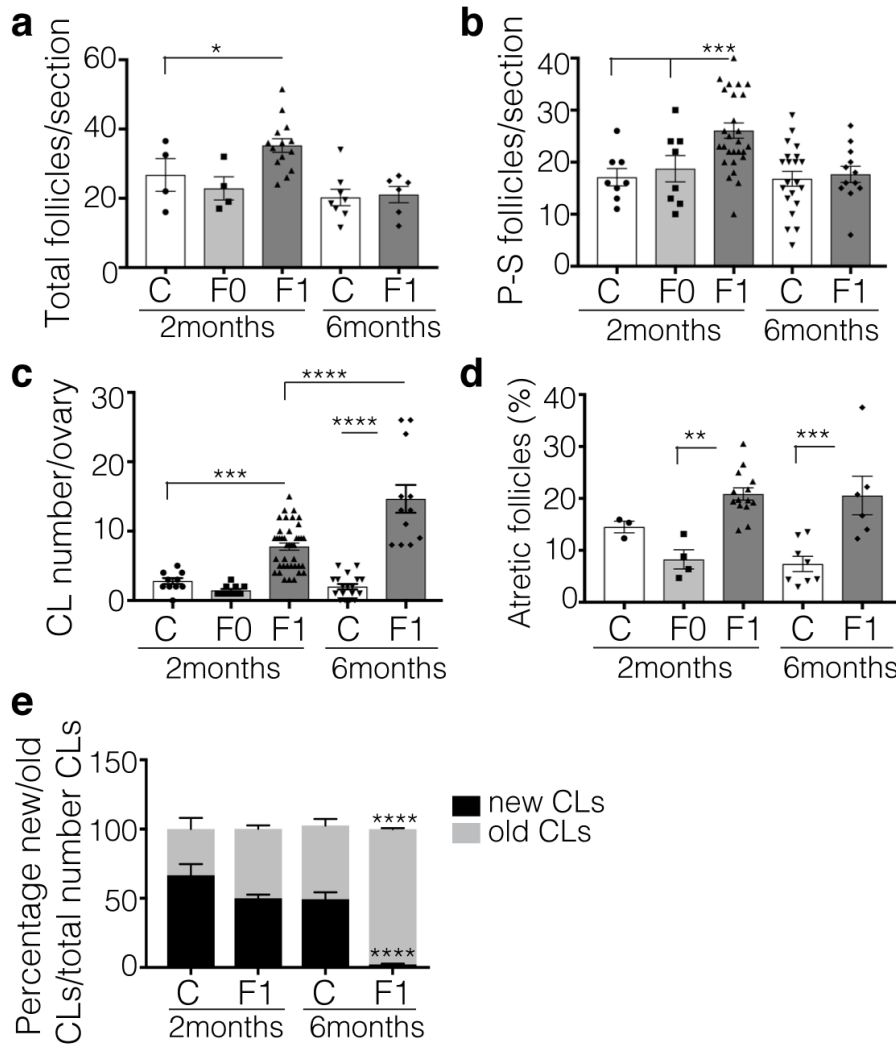

**Supplementary Fig. 4.** Follicle and corpus luteum (CL) counts in 2-month- and 6-month-old ovaries. **a** Total follicle number per section. **b** Primary (P) and secondary (S) follicle number per section. **c** CL number per section. **d** Percentage of atretic follicles relative to the total number of follicles. **e** Percentage of newly formed CLs (new CL) and CLs formed in previous cycles (old CL) in 2-month- and 6-month-old control and F2 ovaries. **a-e** Data are the mean  $\pm$  SEM of all follicles and CLs on 3 sections from ovaries (n=6 to 10 animals per group), and \*P < 0.05, \*\*P < 0.01, \*\*\*P < 0.005, \*\*\*\*P < 0.001.

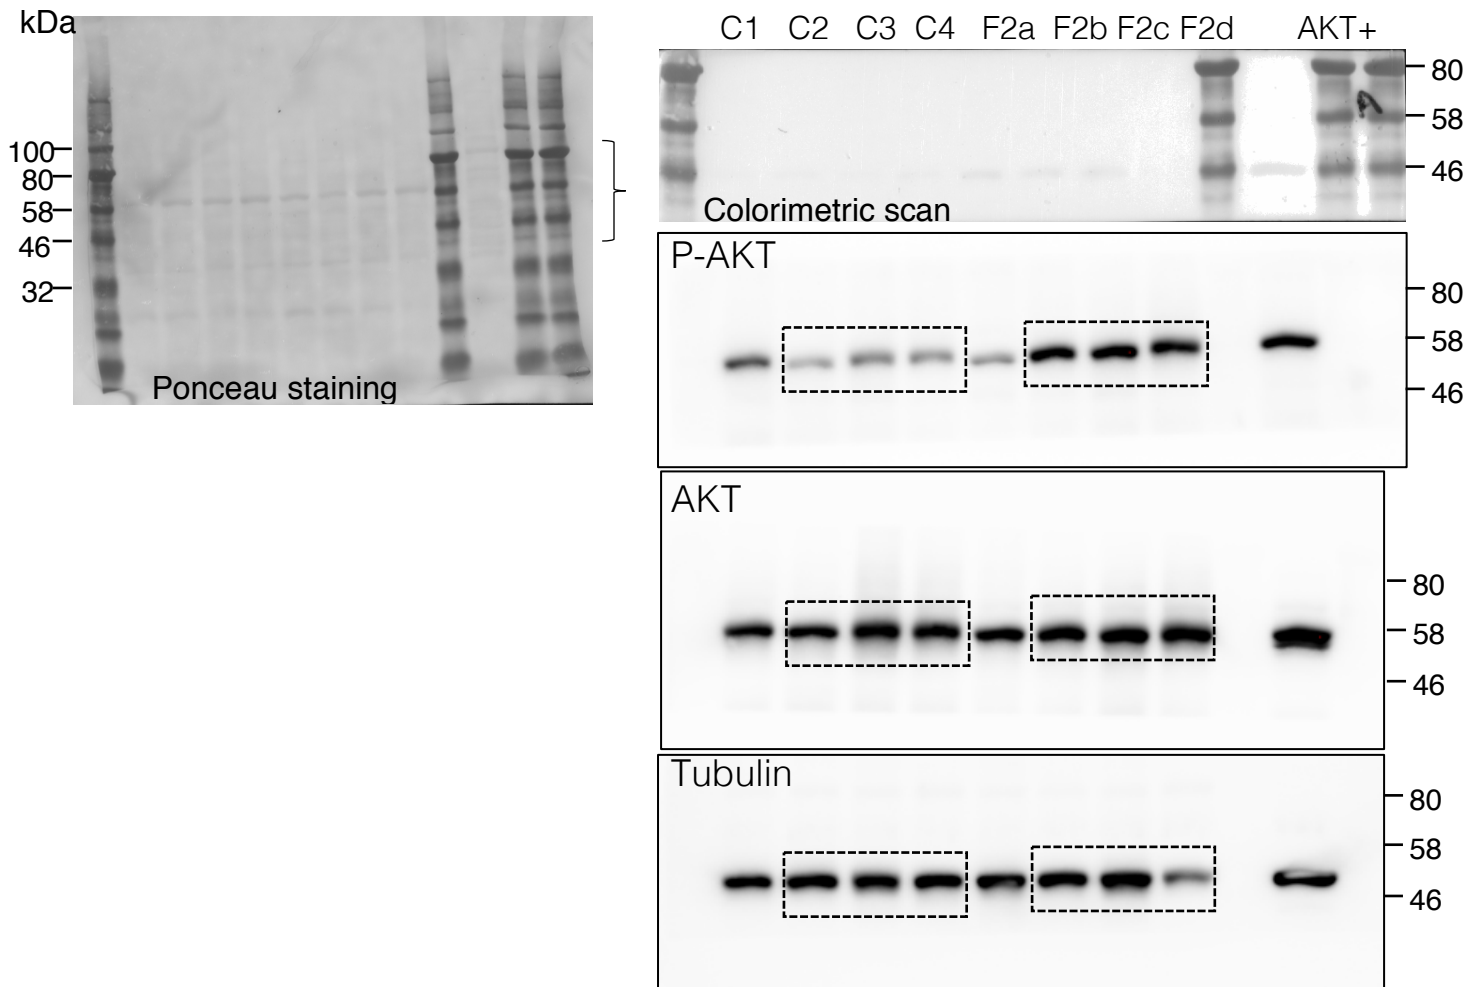

**Supplementary Fig. 5.** Full scans of images of Western blot data; C1-C4 and F2a-F2d are 6month-old control and F2 ovaries; AKT+ is a positive AKT cell extract.

**Supplementary Table 1.** Gene ontology analysis of differentially expressed genes in 13.5dpc APAP+IBU exposed ovaries compared with controls.

| <b>Down-regulated genes/ GO biological process</b>                          | <b>Number of genes</b> |
|-----------------------------------------------------------------------------|------------------------|
| ribosomal small subunit assembly (GO:0000028)                               | 19                     |
| ATP synthesis coupled proton transport (GO:0015986)                         | 21                     |
| energy coupled proton transport, down electrochemical gradient (GO:0015985) | 21                     |
| GTP biosynthetic process (GO:0006183)                                       | 10                     |
| deoxyribonucleoside monophosphate metabolic process (GO:0009162)            | 9                      |
| protein import into mitochondrial matrix (GO:0030150)                       | 17                     |
| positive regulation of protein homooligomerization (GO:0032464)             | 11                     |
| mitochondrial electron transport, ubiquinol to cytochrome c (GO:0006122)    | 13                     |
| guanosine-containing compound biosynthetic process (GO:1901070)             | 13                     |
| cytoplasmic translation (GO:0002181)                                        | 62                     |
| ribosome assembly (GO:0042255)                                              | 70                     |
| NADH dehydrogenase complex assembly (GO:0010257)                            | 42                     |
| mitochondrial respiratory chain complex I assembly (GO:0032981)             | 42                     |
| purine ribonucleoside biosynthetic process (GO:0046129)                     | 20                     |
| cellular detoxification (GO:1990748)                                        | 20                     |
| purine nucleoside biosynthetic process (GO:0042451)                         | 20                     |
| proteasomal ubiquitin-independent protein catabolic process (GO:0010499)    | 24                     |
| cellular response to superoxide (GO:0071451)                                | 13                     |
| cellular response to oxygen radical (GO:0071450)                            | 13                     |
| pyrimidine deoxyribonucleotide metabolic process (GO:0009219)               | 13                     |
| positive regulation of mitochondrial membrane potential (GO:0010918)        | 13                     |
| purine ribonucleoside triphosphate biosynthetic process (GO:0009206)        | 83                     |
| regulation of ubiquitin protein ligase activity (GO:1904666)                | 17                     |
| <b>Up-regulated genes/ GO biological process</b>                            | <b>Number of genes</b> |
| chromosome organization involved in meiotic cell cycle (GO:0070192)         | 71                     |
| homologous chromosome segregation (GO:0045143)                              | 61                     |
| synaptonemal complex organization (GO:0070193)                              | 25                     |
| meiotic chromosome segregation (GO:0045132)                                 | 93                     |
| male meiosis I (GO:0007141)                                                 | 22                     |
| positive regulation of neuron migration (GO:2001224)                        | 20                     |
| microtubule nucleation (GO:0007020)                                         | 20                     |
| reciprocal meiotic recombination (GO:0007131)                               | 45                     |
| homologous recombination (GO:0035825)                                       | 45                     |
| meiosis II (GO:0007135)                                                     | 12                     |
| negative regulation of translation, ncRNA-mediated (GO:0040033)             | 12                     |
| meiosis II cell cycle process (GO:0061983)                                  | 12                     |
| miRNA mediated inhibition of translation (GO:0035278)                       | 12                     |
| centriole-centriole cohesion (GO:0010457)                                   | 12                     |
| regulation of translation, ncRNA-mediated (GO:0045974)                      | 12                     |
| meiotic chromosome separation (GO:0051307)                                  | 23                     |
| synaptonemal complex assembly (GO:0007130)                                  | 22                     |
| DNA synthesis involved in DNA repair (GO:0000731)                           | 28                     |
| resolution of meiotic recombination intermediates (GO:0000712)              | 19                     |
| synapsis (GO:0007129)                                                       | 50                     |
| microtubule anchoring (GO:0034453)                                          | 25                     |
| miRNA metabolic process (GO:0010586)                                        | 16                     |

**Supplementary Table 2.** Meiotic genes that are differentially expressed in 13.5dpc female gonads upon APAP+IBU exposure.

| <b>APAP+IBU downregulated genes</b> |                                                                 | <b>Fold change</b> |
|-------------------------------------|-----------------------------------------------------------------|--------------------|
| <b>Stra8</b>                        | stimulated by retinoic acid gene 8                              | 0.76               |
| <b>Rec8</b>                         | REC8 meiotic recombination protein                              | 0.65               |
| <b>APAP+IBU upregulated genes</b>   |                                                                 | <b>Fold change</b> |
| <b>Rad51ap2</b>                     | RAD51 associated protein 2                                      | 3.15               |
| <b>Tex16</b>                        | testis expressed gene 16                                        | 2.92               |
| <b>Syp1</b>                         | synaptonemal complex protein 1                                  | 2.82               |
| <b>Spata22</b>                      | spermatogenesis associated 22                                   | 2.66               |
| <b>Hfm1</b>                         | HFM1, ATP-dependent DNA helicase homolog                        | 2.47               |
| <b>Syp2</b>                         | synaptonemal complex protein 2                                  | 2.45               |
| <b>Pet2</b>                         | plasmacytoma expressed transcript 2                             | 2.43               |
| <b>Rad21l</b>                       | RAD21-like ( <i>S. pombe</i> )                                  | 2.41               |
| <b>Fbxo47</b>                       | F-box protein 47                                                | 2.40               |
| <b>Ccnb3</b>                        | cyclin B3                                                       | 2.29               |
| <b>Ugt8a</b>                        | UDP galactosyltransferase 8A                                    | 2.21               |
| <b>Ccdc73</b>                       | coiled-coil domain containing 73                                | 2.11               |
| <b>Pramell1</b>                     | preferentially expressed antigen in melanoma-like 1             | 2.08               |
| <b>Spdya</b>                        | speedy/RINGO cell cycle regulator family, member A              | 2.02               |
| <b>Prdm9</b>                        | PR domain containing 9                                          | 2.01               |
| <b>Msh4</b>                         | mutS homolog 4                                                  | 1.98               |
| <b>Tktl1</b>                        | transketolase-like 1                                            | 1.94               |
| <b>Cdkl2</b>                        | cyclin-dependent kinase-like 2 (CDC2-related kinase)            | 1.91               |
| <b>Meioc</b>                        | meiosis specific with coiled-coil domain                        | 1.89               |
| <b>D1Pas1</b>                       | DNA segment, Chr 1, Pasteur Institute 1                         | 1.88               |
| <b>Msh5</b>                         | mutS homolog 5                                                  | 1.87               |
| <b>Tsga10</b>                       | testis specific 10                                              | 1.80               |
| <b>Usp32</b>                        | ubiquitin specific peptidase 32                                 | 1.79               |
| <b>Syp3</b>                         | synaptonemal complex protein 3                                  | 1.78               |
| <b>Spo11</b>                        | SPO11 meiotic protein covalently bound to DSB                   | 1.77               |
| <b>Dmc1</b>                         | DNA meiotic recombinase 1                                       | 1.77               |
| <b>Ddb2</b>                         | damage specific DNA binding protein 2                           | 1.77               |
| <b>Hormad1</b>                      | HORMA domain containing 1                                       | 1.74               |
| <b>Dennd4a</b>                      | DENN/MADD domain containing 4A                                  | 1.72               |
| <b>Dopey1</b>                       | dopey family member 1                                           | 1.72               |
| <b>Caprin2</b>                      | caprin family member 2                                          | 1.71               |
| <b>Adarb1</b>                       | adenosine deaminase, RNA-specific, B1                           | 1.67               |
| <b>Poln</b>                         | DNA polymerase N                                                | 1.67               |
| <b>Taf7l</b>                        | TATA-box binding protein associated factor 7 like               | 1.62               |
| <b>Cyld</b>                         | CYLD lysine 63 deubiquitinase                                   | 1.62               |
| <b>Setdb2</b>                       | SET domain, bifurcated 2                                        | 1.57               |
| <b>Inca1</b>                        | inhibitor of CDK, cyclin A1 interacting protein 1               | 1.55               |
| <b>Crebl2</b>                       | cAMP responsive element binding protein-like 2                  | 1.50               |
| <b>Tex11</b>                        | testis expressed gene 11                                        | 1.49               |
| <b>Tex12</b>                        | testis expressed gene 12                                        | 1.48               |
| <b>Zfp541</b>                       | zinc finger protein 541                                         | 1.46               |
| <b>Hormad2</b>                      | HORMA domain containing 2                                       | 1.45               |
| <b>Dmrtc2</b>                       | doublesex and mab-3 related transcription factor like family C2 | 1.41               |
| <b>Taf9b</b>                        | TATA-box binding protein associated factor 9B                   | 1.40               |
| <b>Ccdc36</b>                       | coiled-coil domain containing 36                                | 1.37               |
| <b>Stag3</b>                        | stromal antigen 3                                               | 1.37               |
| <b>Madd</b>                         | MAP-kinase activating death domain                              | 1.36               |
| <b>Madd</b>                         | MAP-kinase activating death domain                              | 1.36               |
| <b>Syn2</b>                         | synapsin II                                                     | 1.35               |

**Supplementary Table 3.** List of antibodies used for immunofluorescence (IF) experiments on tissues, western blotting (WB) and IF on chromosome spreads (SP).

| <b>Antigen</b>                     | <b>Species</b> | <b>Provider</b>          | <b>Reference</b> | <b>Dilution<br/>WB/IF/SP</b> |
|------------------------------------|----------------|--------------------------|------------------|------------------------------|
| <b>FOXL2</b>                       | Rabbit         | Gift from Dagmar Wilhelm | <sup>1</sup>     | 1/300                        |
| <b>AMH</b>                         | Rabbit         | Gift from N. diClemente  | <sup>2</sup>     | 1/400                        |
| <b>VASA/MVH</b>                    | Rabbit         | Millipore                | AB4330           | 1/300                        |
| <b>VASA/MVH</b>                    | Mouse          | Abcam                    | ab27591          | 1/2000                       |
| <b>PCNA</b>                        | Mouse          | Sigma-Aldrich            | P8825            | 1/500                        |
| <b>FOXO3 (D19A7)</b>               | Rabbit         | Cell Signaling           | 12829            | 1/1000 WB<br>1/500 IF        |
| <b>COUPTFII (NR2F2)</b>            | Mouse          | R&D Systems              | T9026            | 1/300                        |
| <b>AKT(pan) (C67E7)</b>            | Rabbit         | Cell Signaling           | 4691             | 1/1000 WB                    |
| <b>Phosphorylated-AKT (Ser473)</b> | Rabbit         | Cell Signaling           | 9271             | 1/1000 WB                    |
| <b>SYCP3</b>                       | Rabbit         | Abcam                    | ab15093          | 1/200 (IF)                   |
| <b>SYCP3</b>                       | Guinea pig     | Homemade                 | <sup>3</sup>     | 1/1000 (SP)                  |
| <b>SYCP1</b>                       | Rabbit         | Abcam                    | ab15090          | 1/400 (SP)                   |
| <b><math>\gamma</math>H2AX</b>     | Mouse          | Sigma-Aldrich            | 05-636           | 1/1000 (IF)<br>1/10000 (SP)  |



**Supplementary Table 4.** Oligonucleotides used for qPCR. For each gene, the upper oligonucleotide corresponds to the forward primer and the lower to the reverse primer.

| <b>Gene</b>                      | <b>Sequence 5'-3'</b>                              | <b>Gene</b>                         | <b>Sequence 5'-3'</b>                               |
|----------------------------------|----------------------------------------------------|-------------------------------------|-----------------------------------------------------|
| <i>Rps29</i>                     | tgaaggcaagatgggtcac<br>gcacatgttcagcccgtatt        | <i>Akr1c18</i><br>( <i>20αHsd</i> ) | tggccctagccaagagttt<br>gccaattggaaatcaaagacc        |
| <i>18S</i>                       | gatccattggagggcaagtct<br>ccaagatccaactacgagcttt    | <i>ProgR</i>                        | tgcacctgatctaatacctaaatga<br>ggtaaggcacagcggagtagaa |
| <i>Amh</i>                       | ggggagactggagaacagc<br>agagctcgggctcccata          | <i>StaR</i>                         | ttgggcataactcaacaacca<br>acttcgtccccgttctcc         |
| <i>FoxL2</i>                     | cgggggttcctcaacaactc<br>catctggcaggaggcgta         | <i>Cyp11a1</i>                      | aagtatggccccatttacagg<br>tggggtccacgatgtaaact       |
| <i>Wnt4</i>                      | gcgtagcctctcagatcc<br>cgcatgtgtgcaagatgg           | <i>Lhcgr</i>                        | gatgcacagtggcaccttc<br>cctgcaatttgggtggaagag        |
| <i>Rspo1</i>                     | cgacatgaacaaatgatca<br>ctcctgacacttggtgcaga        | <i>Hsd3β</i>                        | gaccagaaccaaggaggaa<br>gcactgggcatccagaat           |
| <i>FoxO1</i>                     | cttcaaggataaggcgaca<br>gacagatttggcggaattga        | <i>Pten</i>                         | aggcacaagaggccctagat<br>ctgactgggaattgtgactcc       |
| <i>Pou5fl</i><br>( <i>Oct4</i> ) | cctgggggctctatttgg<br>ctcctgaagatttctattgtgctc     | <i>Akt1</i>                         | tctgtgtggcaggatgtgtat<br>acctggtgtcagtctcagagg      |
| <i>Ddx4</i><br>( <i>Vasa</i> )   | cgccaaacccttatgttcag<br>aaaaactctgcagccaacctt      | <i>Akt2</i>                         | ataccaggcacccttct<br>caciaagcataggcggctca           |
| <i>Dppa4</i>                     | gctttcccagaacaaatgct<br>ttgtgagctgtcttcaacctg      | <i>PI3K</i>                         | ccagacagtgttttgaagagga<br>tccatgccctatgcgact        |
| <i>Kitlg</i>                     | tcaacattaggtcccagagaaa<br>actgctactgctgtcattcctaag | <i>Pdk1</i>                         | tgatgaagactgctatggcaac<br>cgtagacaggagtggaag        |
| <i>Nobox</i>                     | acggagaagctctgcaagaa<br>ctgtctccagtgcagcagtc       | <i>MTor</i>                         | agaagacagcggggaagg<br>gcatctgccctgaggttc            |
| <i>Figla</i>                     | ggaagaagcgaaggtctcag<br>gtcagagggctctgccactgt      | <i>FoxO3</i>                        | gctaagcaggcctcatctca<br>ttccgtcagtttggagggtct       |
| <i>Sohlh1</i>                    | gagcgcgttgcattcagt<br>ctggctgcatgagtgag            | <i>Lhx8</i>                         | gatgggacgatgctgactg<br>ggctattggatgggtaaca          |
| <i>Bmp15</i>                     | acacagtaaggcctcccaga<br>tgctacctggtttgatgctaga     | <i>Gdf9</i>                         | accagcaaccaggtgac<br>cgatttgagcaagtgttccat          |

## Supplementary References

- 1 Wilhelm, D. *et al.* Antagonism of the testis- and ovary-determining pathways during ovotestis development in mice. *Mech Dev* **126**, 324-336, doi:10.1016/j.mod.2009.02.006 (2009).
- 2 Tran, D., Picard, J. Y., Campargue, J. & Josso, N. Immunocytochemical detection of anti-mullerian hormone in Sertoli cells of various mammalian species including human. *J Histochem Cytochem* **35**, 733-743, doi:10.1177/35.7.3295030 (1987).
- 3 Grey, C., Baudat, F. & de Massy, B. Genome-wide control of the distribution of meiotic recombination. *PLoS Biol* **7**, e35, doi:10.1371/journal.pbio.1000035 (2009).
